# Supplementary material for: Functional Identification of HhUGT74AG11—A Key Glycosyltransferase Involved in Biosynthesis of Oleanane-Type Saponins in Hedera helix
Source: MDPI journal article supplement (doi:10.3390/ijms25074067), 2024-04-05
Supplement: s1 [file s1]

# Supplementary Material

## Supplementary Figures

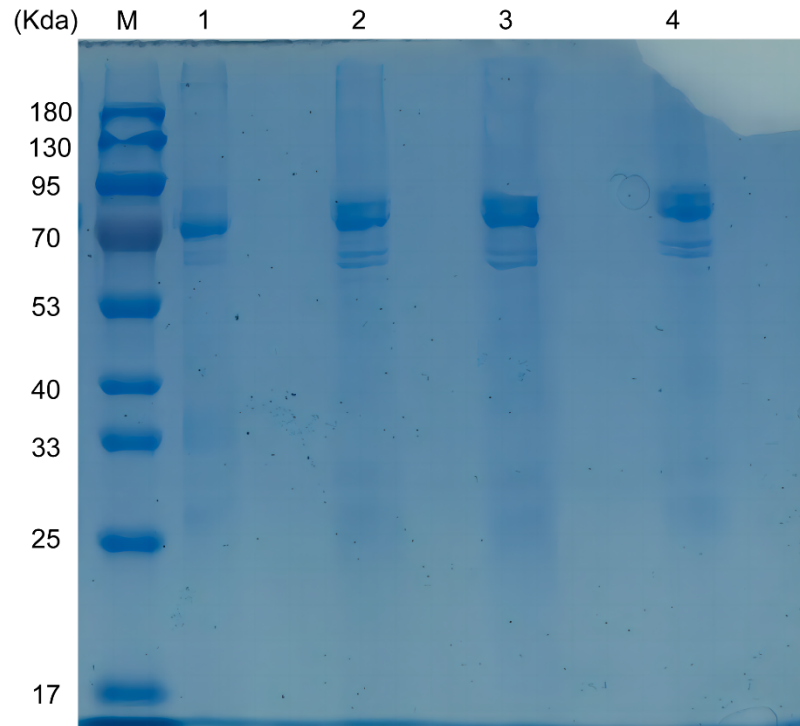

**Supplementary Figures S1.** SDS-PAGE of recombinant *HhUGTs* purified using GST affinity chromatography. M, standard protein markers (PageRuler™ Prestained Protein Ladder, 10-180 kDa, Thermo). 1, Unigene26859 (*HhUGT74AG11*); 2, Unigene31717; 3, CL11391.Contig2; 4, CL144.Contig9.

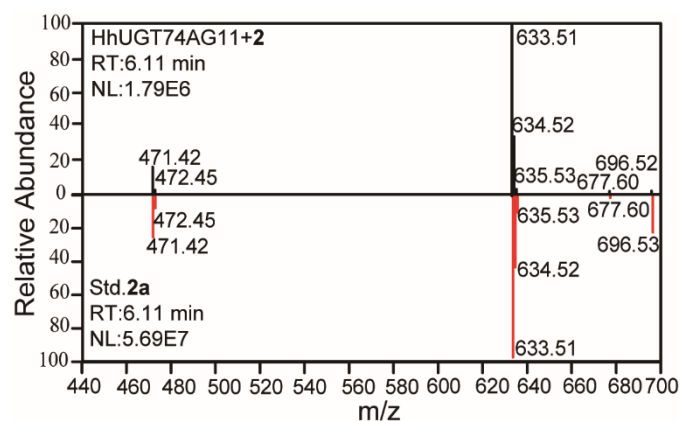

**Supplementary Figures S2.** Hederagenin (2) as the substrate of *HhUGT74AG11*. MS/MS fragmentation of the product peaks by *HhUGT74AG11* + 2 compared with fragmentation results of the Std. 2a ([(-)-mode],  $m/z$  = 633.51).

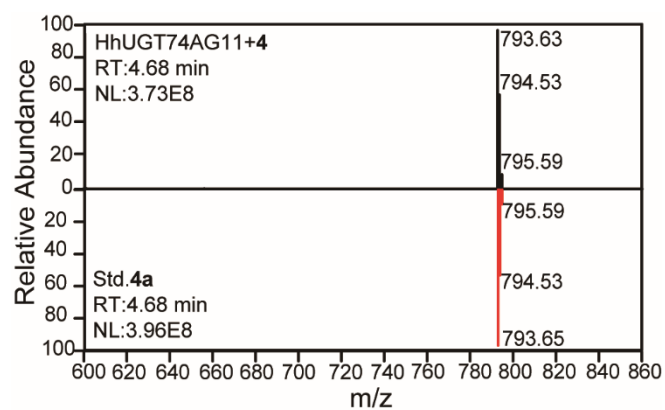

**Supplementary Figures S3.** Calendulose E (4) as the substrate of *HhUGT74AG11*. MS/MS fragmentation of the product peaks by *HhUGT74AG11* + 4 compared with fragmentation results of the Std. 4a ([(-)-mode],  $m/z$  = 793.65).

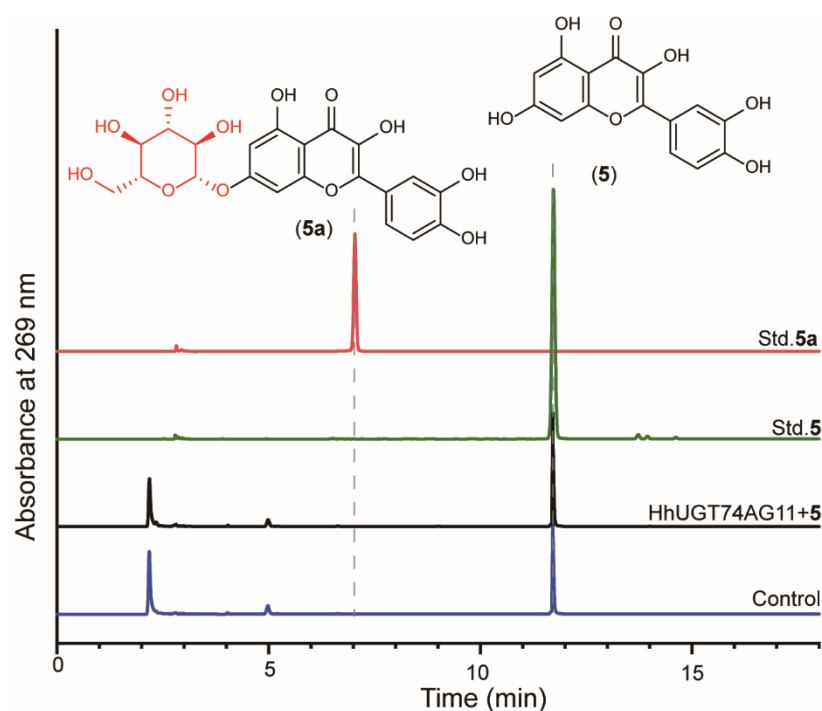

**Supplementary Figures S4.** Quercetin 5 as the substrate of *HhUGT74AG11*. HPLC analysis (monitored at 269 nm) of the reaction mixtures; quercetin-7-O- $\beta$ -D-glucopyranoside **5a**, quercetin **5**.

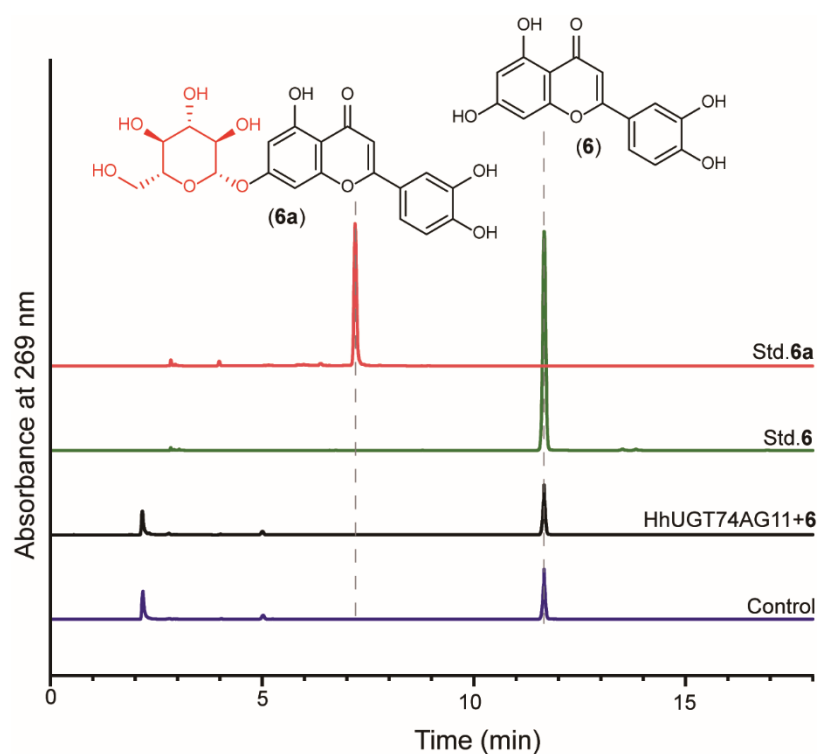

**Supplementary Figures S5.** Luteolin 6 as the substrate of *HhUGT74AG11*. HPLC analysis (monitored at 269 nm) of the reaction mixtures; cynaroside **6a**, luteolin **6**.

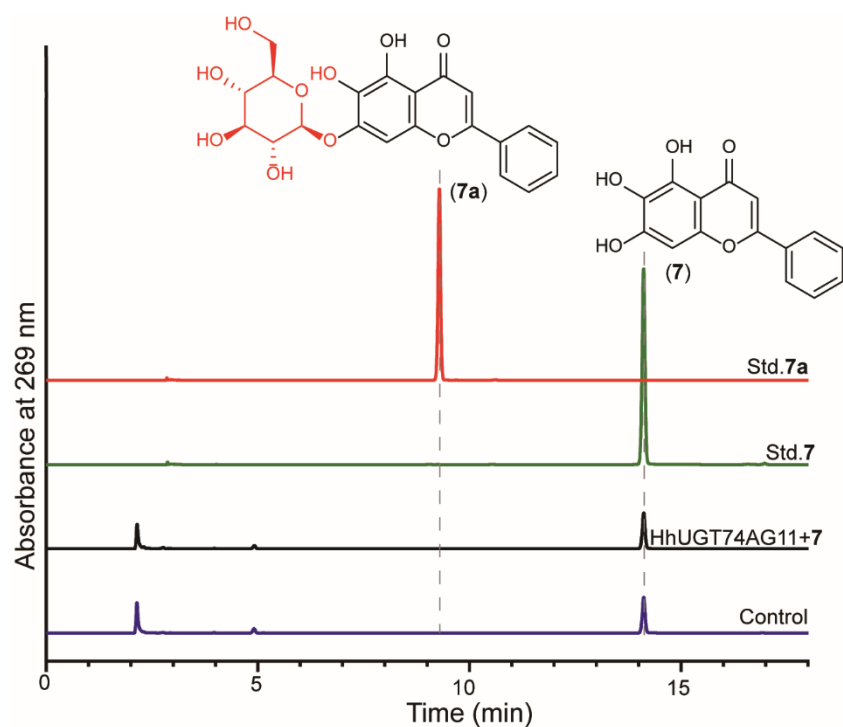

**Supplementary Figures S6.** Baicalein **7** as the substrate of *HhUGT74AG11*. HPLC analysis (monitored at 269 nm) of the reaction mixtures; oroxin A **7a**, baicalein **7**.

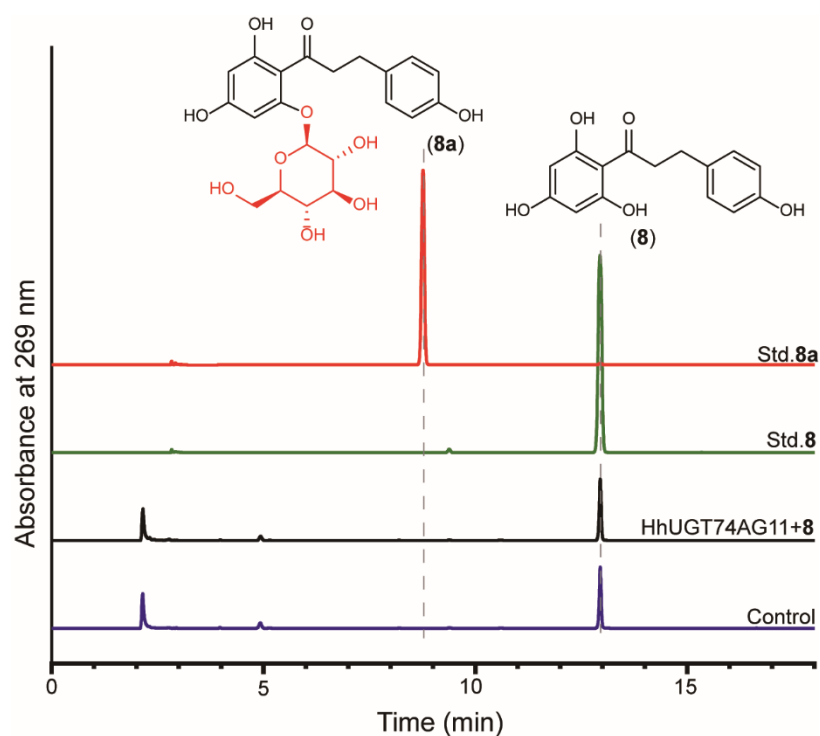

**Supplementary Figures S7.** Phloretin **8** as the substrate of *HhUGT74AG11*. HPLC analysis (monitored at 269 nm) of the reaction mixtures; phlorizin **8a**, phloretin **8**.

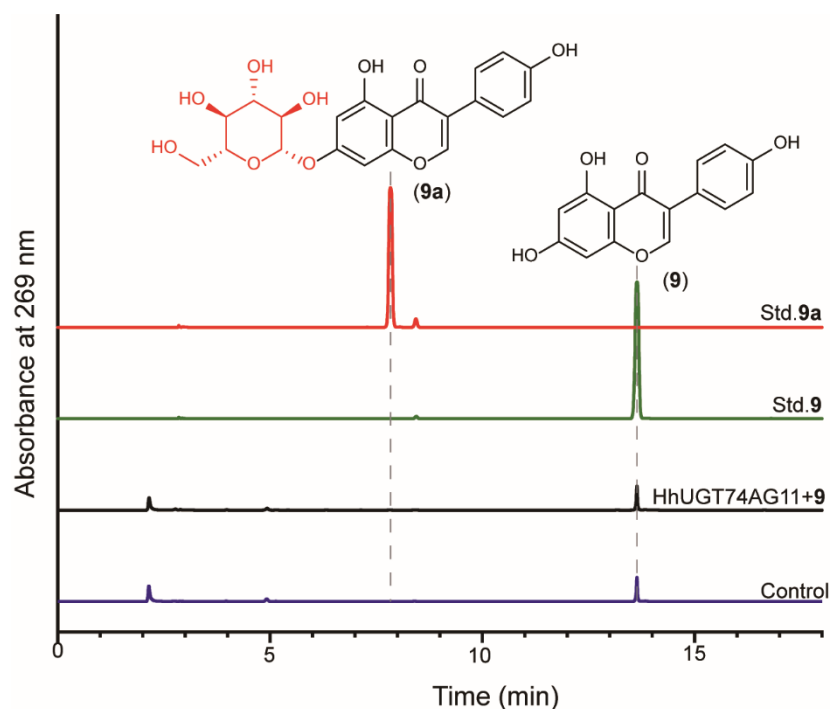

**Supplementary Figures S8.** Genistein 9 as the substrate of *HhUGT74AG11*. HPLC analysis (monitored at 269 nm) of the reaction mixtures; genistin **9a**, genistein **9**.

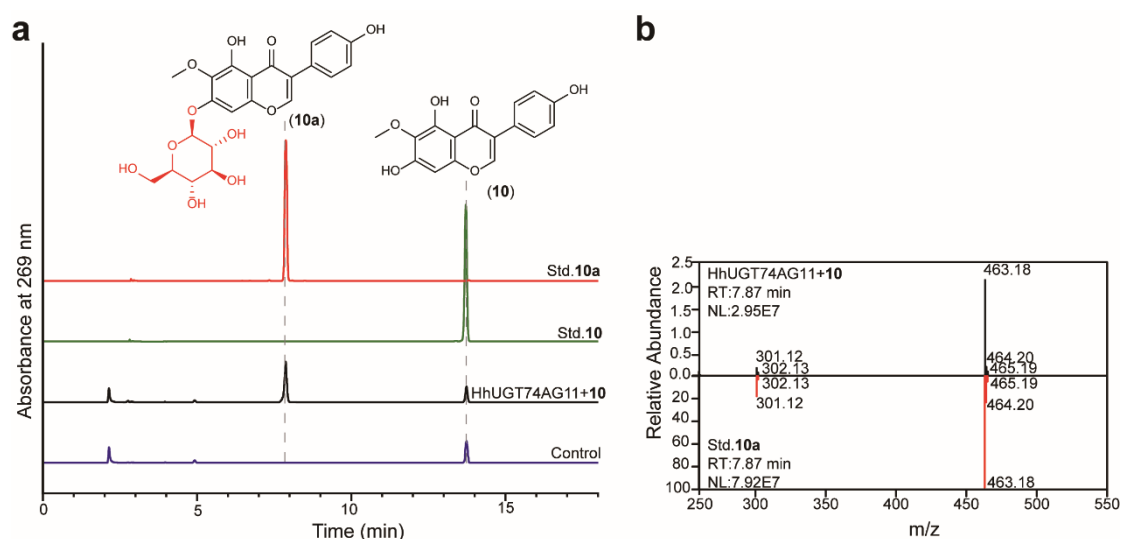

**Supplementary Figures S9.** Tectorigenin 10 as the substrate of *HhUGT74AG11*. a: HPLC analysis (monitored at 269 nm) of the reaction mixtures; tectoridin **10a**, tectorigenin **10**; b: MS/MS fragmentation of the product peaks by *HhUGT74AG11* + **10** compared with fragmentation results of the Std. **10a** ([(-)-mode],  $m/z = 463.18$ ).

## Supplementary Tables

**Table S1. Primers used in this study.**

| Primer                                                    | Sequences (5'-3')                                        |
|-----------------------------------------------------------|----------------------------------------------------------|
| Unigene26859<br>( <i>HhUGT74AG11</i> )-<br>Forward primer | gatctggttccgcgtggatccATGGAGAATGAGAAAACCTTATAAAG<br>CTC   |
| Unigene26859<br>( <i>HhUGT74AG11</i> )-<br>Reverse primer | ctcgagtcgacccgggaattcTTAGAGTGCCAAAATCCGAGAAA             |
| Unigene31717-<br>Forward primer                           | gatctggttccgcgtggatccATGGCCGCGAATGACAAA                  |
| Unigene31717-<br>Reverse primer                           | ctcgagtcgacccgggaattcTCATTTTTTGAGGATTTTATGATTTTC         |
| CL11391.Contig2-<br>Forward primer                        | gatctggttccgcgtggatccATGGCGGTGGCCGGCGCC                  |
| CL11391.Contig2-<br>Reverse primer                        | ctcgagtcgacccgggaattcTTAGTATTCAGATAAATGTCTAACC<br>AACTCA |
| CL144.Contig9-<br>Forward primer                          | gatctggttccgcgtggatccATGGAAGAGAGAAAAGGAAAGACC<br>A       |
| CL144.Contig9-<br>Reverse primer                          | ctcgagtcgacccgggaattcCTATTCATTCTCCCCTCTTGGCT             |

**Table S2. The expression profiles of 82 unigenes in this study.**

| geneID          | L1      | L2      | L3       | R1      | R2_     | R3      |
|-----------------|---------|---------|----------|---------|---------|---------|
| CL10734.Contig3 | 0.9915  | 0.8409  | 1.4965   | 0.6242  | 0.3793  | 0.6069  |
| CL8643.Contig2  | 0.7677  | 0.9567  | 0.713    | 1.0494  | 1.9018  | 0.8593  |
| Unigene7122     | 0.3531  | 0.3423  | 0.3423   | 0.3423  | 0.7204  | 3.8043  |
| CL4883.Contig1  | 2.5633  | 1.5719  | 2.9153   | 5.0056  | 1.8678  | 8.249   |
| CL5071.Contig1  | 1.6293  | 2.969   | 2.1792   | 3.7417  | 3.1247  | 4.3405  |
| CL84.Contig7    | 1.2457  | 1.2074  | 1.3612   | 7.7864  | 3.1021  | 7.0639  |
| Unigene12948    | 0.2697  | 0.6151  | 0.6189   | 0.3356  | 0.1456  | 0.4506  |
| CL10135.Contig5 | 1.6004  | 1.7936  | 1.7652   | 5.0878  | 4.1325  | 5.4862  |
| Unigene31942    | 1.6249  | 1.1812  | 1.0061   | 0.2728  | 0.5525  | 0.6631  |
| CL2755.Contig4  | 0.0381  | 0.0739  | 0.1062   | 0.0384  | 0.2332  | 0.4851  |
| CL1653.Contig1  | 3.5483  | 4.0427  | 2.7175   | 4.0755  | 4.8897  | 6.8895  |
| CL2011.Contig4  | 14.5591 | 18.1027 | 16.3217  | 22.1462 | 21.1738 | 19.7054 |
| Unigene1574     | 3.6483  | 2.5718  | 0.9242   | 2.3384  | 0.3383  | 0.6497  |
| Unigene19763    | 0.8496  | 1.3528  | 0.9018   | 2.3226  | 2.1666  | 1.4858  |
| Unigene19769    | 0.671   | 1.0643  | 0.7932   | 1.1059  | 1.1201  | 1.0754  |
| Unigene24545    | 0.7998  | 0.5814  | 0.7163   | 3.136   | 2.3894  | 4.4202  |
| CL1679.Contig2  | 1.8171  | 2.418   | 1.1156   | 1.8922  | 1.885   | 2.2019  |
| CL1680.Contig1  | 1.8354  | 2.1906  | 2.0482   | 6.1806  | 6.0641  | 3.7696  |
| CL1710.Contig3  | 0.2427  | 0.2521  | 0.1288   | 5.3612  | 6.4556  | 4.8566  |
| CL1719.Contig2  | 5.7806  | 3.9834  | 3.1879   | 4.7762  | 8.1082  | 5.0866  |
| CL1741.Contig3  | 67.6352 | 74.3865 | 94.6205  | 10.4303 | 11.4763 | 6.3986  |
| CL6964.Contig4  | 0.3123  | 0.2018  | 0.1934   | 1.1533  | 2.4423  | 7.7483  |
| CL7506.Contig1  | 3.1544  | 4.3933  | 3.3565   | 3.9792  | 4.3425  | 3.6593  |
| CL4453.Contig5  | 2.5397  | 2.8625  | 2.4686   | 2.8556  | 4.6394  | 3.4709  |
| Unigene20397    | 4.5627  | 5.7292  | 5.2974   | 2.3501  | 3.5967  | 5.0782  |
| Unigene27513    | 0       | 0.2729  | 0.3922   | 3.2609  | 2.7282  | 1.6543  |
| Unigene37653    | 1.6776  | 1.084   | 0.2597   | 0.5632  | 1.9965  | 0       |
| CL12103.Contig1 | 1.1888  | 1.8536  | 1.3922   | 1.4056  | 1.8981  | 1.873   |
| CL3433.Contig7  | 1.7506  | 2.4824  | 1.5055   | 3.102   | 3.4393  | 1.4288  |
| CL718.Contig1   | 16.536  | 11.3226 | 17.0027  | 29.7457 | 23.2137 | 19.6131 |
| Unigene32600    | 0.6183  | 3.2961  | 1.7228   | 0.3114  | 0.3154  | 0.3028  |
| CL12227.Contig3 | 46.0956 | 53.1297 | 39.9672  | 4.7912  | 7.5326  | 4.2691  |
| CL308.Contig1   | 7.0386  | 8.149   | 9.7154   | 7.0895  | 5.1857  | 8.7129  |
| Unigene21454    | 4.0585  | 1.7484  | 0.8377   | 0.1514  | 0.1533  | 0.2944  |
| Unigene22346    | 1.1258  | 1.0912  | 0.8043   | 2.0934  | 1.1042  | 1.4843  |
| CL3923.Contig4  | 61.2911 | 64.444  | 76.5068  | 19.4209 | 25.1727 | 22.3582 |
| CL8585.Contig2  | 2.1114  | 1.3449  | 2.0731   | 0.1052  | 0.1052  | 0.1052  |
| Unigene7386     | 2.8003  | 4.1405  | 4.2762   | 3.6811  | 2.082   | 4.8811  |
| CL6504.Contig2  | 92.4307 | 57.1962 | 114.7202 | 0.5237  | 0.5304  | 0.4365  |
| Unigene15662    | 25.0961 | 14.7295 | 26.5278  | 9.772   | 5.1505  | 12.5565 |

|                 |          |          |          |          |          |          |
|-----------------|----------|----------|----------|----------|----------|----------|
| Unigene7507     | 31.3605  | 27.2478  | 33.8378  | 11.5539  | 4.3693   | 9.3544   |
| CL6504.Contig2  | 92.4307  | 57.1962  | 114.7202 | 0.5237   | 0.5304   | 0.4365   |
| CL9981.Contig2  | 45.8707  | 39.9531  | 36.7244  | 0.5206   | 0.1318   | 0.5062   |
| CL9981.Contig1  | 7.2625   | 5.2092   | 5.5313   | 0.0001   | 0.0001   | 0.0001   |
| CL5897.Contig1  | 43.4022  | 14.2551  | 42.7668  | 53.7554  | 3.9851   | 89.6598  |
| CL720.Contig1   | 0.3635   | 0.2883   | 0.2455   | 1.2315   | 0.6405   | 0.2589   |
| Unigene17579    | 14.1423  | 12.9285  | 18.4512  | 3.8113   | 10.229   | 9.0334   |
| CL9843.Contig1  | 3.4026   | 2.9212   | 3.5215   | 5.0265   | 3.5372   | 5.7447   |
| CL8670.Contig1  | 429.2733 | 336.8246 | 574.4803 | 132.8436 | 14.1181  | 196.9498 |
| CL2359.Contig2  | 75.6548  | 48.5475  | 174.78   | 0.0921   | 0.0467   | 0.1344   |
| Unigene20154    | 0.7104   | 0.4734   | 0.0825   | 7.2451   | 10.1008  | 9.4804   |
| Unigene8931     | 2.3476   | 1.6118   | 2.3622   | 11.1332  | 17.1629  | 7.4248   |
| Unigene10909    | 53.3615  | 46.9282  | 79.2753  | 38.0871  | 36.9196  | 40.5264  |
| CL2288.Contig1  | 130.9246 | 92.8239  | 146.6269 | 0.2656   | 0.0897   | 0.2583   |
| Unigene26859    | 4.4025   | 4.0163   | 3.4477   | 14.1725  | 16.5554  | 28.1965  |
| Unigene6593     | 31.1151  | 5.8765   | 52.6342  | 0.6056   | 0.0511   | 1.1287   |
| Unigene22454    | 35.6495  | 19.5374  | 76.1373  | 6.4195   | 1.0572   | 3.8062   |
| Unigene31717    | 0.2961   | 1.148    | 0.4584   | 109.6537 | 240.5387 | 108.3176 |
| CL7205.Contig1  | 63.1729  | 56.0285  | 63.0994  | 0.5233   | 0.0883   | 0.1696   |
| CL9425.Contig1  | 29.7613  | 15.6297  | 57.404   | 0.4178   | 0.2116   | 0.6094   |
| Unigene27341    | 12.9111  | 9.5695   | 22.1988  | 0.4661   | 1.8072   | 0.92     |
| CL8278.Contig2  | 120.4899 | 414.6659 | 376.3691 | 5.2658   | 4.0753   | 15.7959  |
| CL8684.Contig2  | 26.2099  | 36.7485  | 23.2495  | 1.9646   | 0.2902   | 1.1542   |
| CL4177.Contig2  | 122.1633 | 171.6265 | 180.4338 | 77.061   | 58.0098  | 56.7277  |
| CL6439.Contig1  | 5.8063   | 23.1769  | 20.7382  | 11.6965  | 6.8385   | 7.703    |
| CL11391.Contig2 | 25.4757  | 21.0486  | 20.7154  | 65.2426  | 79.1428  | 76.6022  |
| Unigene13588    | 17.586   | 18.561   | 9.8458   | 2.4602   | 4.4351   | 1.0526   |
| CL12077.Contig3 | 62.3858  | 52.4807  | 79.0922  | 16.8788  | 19.2316  | 25.1098  |
| CL8156.Contig9  | 22.7943  | 17.6307  | 27.7155  | 17.6252  | 16.1596  | 24.941   |
| CL11669.Contig2 | 21.2336  | 31.9446  | 28.6428  | 7.0658   | 5.3792   | 9.7758   |
| CL419.Contig1   | 53.4301  | 52.3786  | 65.4227  | 2.2056   | 1.936    | 0.9294   |
| CL10096.Contig2 | 92.8695  | 63.4411  | 56.459   | 0.4315   | 0.7284   | 0.4662   |
| CL10480.Contig1 | 454.6486 | 348.7123 | 575.5306 | 1.2092   | 0.2449   | 1.2698   |
| Unigene20624    | 10.6391  | 11.6574  | 12.3736  | 8.2933   | 8.4666   | 8.8345   |
| Unigene23490    | 27.6322  | 104.0617 | 91.7902  | 0.1228   | 0        | 0.0398   |
| CL144.Contig9   | 3.1617   | 3.9337   | 2.7613   | 5.371    | 8.5687   | 3.3739   |
| Unigene25019    | 68.8753  | 57.6478  | 75.8665  | 6.0388   | 7.5349   | 17.8509  |
| CL10438.Contig2 | 33.0103  | 30.2388  | 37.6128  | 26.4587  | 30.1172  | 22.7682  |
| CL1235.Contig3  | 15.3708  | 27.4234  | 44.9475  | 2.5094   | 2.7569   | 4.8389   |
| Unigene27253    | 9.8195   | 10.5903  | 12.4603  | 0.9751   | 0.4703   | 0.6321   |
| CL11671.Contig1 | 95.1753  | 74.2572  | 70.5888  | 42.6534  | 32.2674  | 33.2357  |



**Table S3. Amino acid sequences of *HhUGTs* candidates.**

**> Unigene26859 (*HhUGT74AG11*, OR902350)**

MENEKTYKAHIMVLAYHGGHINPMVQFSKRLASKGMKITVTTTSLNKA VKTASSS  
VILESIYDDATEGGVGAPGGFGFLDRFEASGSRNLIELIKKQENSGYPIKCLVYDANIP  
WASNIAKQFAIPGAFFFTQSCAAVASYYPMHCDLSEKSLPFPAPFSMPGLPPP KLLYLPS  
LGAVTGQYSPIIRYICKQFDNIENAEWVLFNSFDKLEEEVVKWMSNLWTVRNIGPTVP  
SVYLDNRVENDSDYGFNLFKPSTEVCMQWLNTKETGSVVYVSFGSAASLSAEQMAEM  
AEALKQSRNSFLWVVKPTEESKLPTNFIEETSEKGLVVTWCPQLEVLAHHAVGCFISH  
CGWNSTVEAISFGVPV VAMPQFLDQMTNAYFVEKVGWVGVIQPKENEENVTSAAEEIGR  
CINEVMDGEEIKKKAMQWKELAKEAIDENGSSDKSIDEIISRILAL\*

**> Unigene31717**

MAANDKLHIVMFPWLAFGHILPYLKLAKLIAKKGHKISFISTPRNIDRLPKIPP NVAPLI  
DLVKFPLPSIPNLPENAEATMDVPFNEVKYLKIA YDQLQQPLTQFLESNSPNWILFDLIP  
YWVGPIASKLNVRSAFFSIFSASQLGYFGPPSEMMDGDEDHQKPEDYTIKPKWVRFETS  
VAPSLHQMQRVVFVNFTKDDTENVPDLYRFAASIRDCDMVIIRSSSEFEPQWLELLDEIY  
EKPVVQVGLLPTD TDTDTGNESNDSWRDIKWLDKQEEG SVIYIAFGAETKPNQDEL  
TELALGLELSRLPFIWAIRKQRGLADPEPTELPEGFEERTRGRGLVYTTWVPQT KILSHD  
SVGGLLIHSGWSSVIEAVQFGRAMILLPFLGDQELIAKLVEEKKLGYLIPRNERD GWFSR  
DSVAESVRLVMVEEEGKIYRTNVKEMKGVFGDMDKQDKYVDNLLSFLENHKILKK\*

**> CL11391.Contig2**

MAVAGAGAHILIFPYPAQGHMIPLLDLTHQLAIRGLTITILVTPKNLSLLNPLLSKHPSIK  
PLVLPFPATPSIPDGVENVKDLPVGGFRAMMTALGKLYNPILNWFQSHPSPPVAIISDM  
FLGWTHRLACQLSIRRFVFCPSGALAMSVIFALWRDMPQKNDHCDENELISFEIPNSP  
VYPWWQLSTVYRSYIAGDPQSEFLKDSFRGNIASWGLVINSFSELERVYLDYLKESLGH  
DRVWPVGP LLPPENDRVSRGGSSLVDSEITSWLDKFEDRTAVYVCFGSQAVLTNKQM  
EELALGLEKSGVTFLWSSKIPTKGHVEGLYGVMPSGFEDRVAGRGLVIKEWAPQVTILS  
HRAVGTF LTHCGWNSVLESIVAGVPM LAWPMGADQFTNADLLDEVKVGVRVCEGES  
TVPDSDQLARLLAKAVSNEERVETIVTAKELSKAALNSTKMGGSSYKSVDELVRHLSEY  
\*

**> CL144.Contig9**

MEERKGKTIVLFPYMAQGHII PFLALALQIEKKGYQITFVNTPLNIKNLRQSLPLNTSIRL  
LEIPFNSSHRLPPETENTDGVNFSLTTLLEASVSLKPAFRNLISDLVRCAQPLAIID  
IFLGWTA EVAHEFGIFHTIFSTGGFGMACYYSVWMNLPHNNTDSVEFTLPDFPEAGRI  
HRTQLSANVLAADGTD PWSKILQLLLSSWVDS DGILFNTIEEIDKIGLHYFRKKLSLPV  
WPIGPILLSVDTRAGTSENPGISSESCINWLDSKPANSVIYVSFGSQNTISASQMMQLAK  
ALDSIDINFIWVRPPLGFDINLEFHAE EWLPEGFLKRIEDQNRGLIIVKWAPQVEILLH  
KAVAAFLSHCGWNSLLESLSGGVPLIGWPMGAEQFYNVKYLEEEVGVCVELARGTNF  
EVRSEDIVEKIGILMRENGKGKEMREKACEVKKMIEDGGRDEEGYKGSSVKAMEEFLN  
VAAKEKKPRGENE\*

**Table S4. Protein sequences used for phylogenetic analysis with their corresponding accession numbers.**

| <i>Protein Name</i> | <i>Plant species</i>          | <i>Accession No.</i> |
|---------------------|-------------------------------|----------------------|
| <b>UGT71</b>        |                               |                      |
| <i>AtUGT71B5</i>    | <i>Arabidopsis thaliana</i>   | OAO99526.1           |
| <i>AtUGT71B6</i>    | <i>Arabidopsis thaliana</i>   | Q9LSY6.1             |
| <i>AtUGT71B7</i>    | <i>Arabidopsis thaliana</i>   | Q9LSY5.2             |
| <i>AtUGT71B2</i>    | <i>Arabidopsis thaliana</i>   | Q9LSY8.1             |
| <i>AtUGT71B8</i>    | <i>Arabidopsis thaliana</i>   | Q9LSY4.1             |
| <i>AtUGT71B1</i>    | <i>Arabidopsis thaliana</i>   | Q9LSY9.1             |
| <i>AtUGT71C1</i>    | <i>Arabidopsis thaliana</i>   | O82381.1             |
| <i>AtUGT71C2</i>    | <i>Arabidopsis thaliana</i>   | OAP11738.1           |
| <i>AtUGT71D1</i>    | <i>Arabidopsis thaliana</i>   | O82383.1             |
| <i>AtUGT71D2</i>    | <i>Arabidopsis thaliana</i>   | O82385.1             |
| <i>BvUGT71B11</i>   | <i>Barbarea vulgaris</i>      | AVW82170.1           |
| <i>BvUGT71B10</i>   | <i>Barbarea vulgaris</i>      | AVW82187.1           |
| <i>BvUGT71B9</i>    | <i>Barbarea vulgaris</i>      | AVW82173.1           |
| <i>BvUGT71C8</i>    | <i>Barbarea vulgaris</i>      | AVW82176.1           |
| <i>BvUGT71D3</i>    | <i>Barbarea vulgaris</i>      | AVW82167.1           |
| <i>MtUGT71G1</i>    | <i>Medicago truncatula</i>    | AAW56092.1           |
| <i>CaUGT71K2</i>    | <i>Cucurbita argyrosperma</i> | KAG7037474.1         |
| <b>UGT72</b>        |                               |                      |
| <i>AtUGT72B1</i>    | <i>Arabidopsis thaliana</i>   | Q9M156.1             |
| <i>AtUGT72C1</i>    | <i>Arabidopsis thaliana</i>   | O23205.3             |
| <i>AtUGT72D1</i>    | <i>Arabidopsis thaliana</i>   | Q9ZU72.1             |
| <i>AtUGT72E1</i>    | <i>Arabidopsis thaliana</i>   | OAP04815.1           |
| <i>BvUGT72D3</i>    | <i>Barbarea vulgaris</i>      | AVW82171.1           |
| <i>LjUGT72AF1</i>   | <i>Lotus japonicus</i>        | AOG18239.1           |
| <i>LjUGT72V3</i>    | <i>Lotus japonicus</i>        | AOG18244.1           |
| <b>UGT73</b>        |                               |                      |
| <i>AtUGT73C5</i>    | <i>Arabidopsis thaliana</i>   | OAP09184.1           |
| <i>AtUGT73C6</i>    | <i>Arabidopsis thaliana</i>   | OAP07438.1           |
| <i>AtUGT73C3</i>    | <i>Arabidopsis thaliana</i>   | Q9ZQ96.1             |
| <i>AtUGT73C4</i>    | <i>Arabidopsis thaliana</i>   | Q9ZQ97.1             |
| <i>AtUGT73C2</i>    | <i>Arabidopsis thaliana</i>   | OAP09975.1           |
| <i>AtUGT73C1</i>    | <i>Arabidopsis thaliana</i>   | OAP11697.1           |
| <i>AtUGT73C7</i>    | <i>Arabidopsis thaliana</i>   | OAP05301.1           |
| <i>AtUGT73D1</i>    | <i>Arabidopsis thaliana</i>   | OAP05971.1           |
| <i>AtUGT73B2</i>    | <i>Arabidopsis thaliana</i>   | OAO97622.1           |

|                       |                              |                |
|-----------------------|------------------------------|----------------|
| <i>At</i> UGT73B3     | <i>Arabidopsis thaliana</i>  | OAO99384.1     |
| <i>At</i> UGT73B4     | <i>Arabidopsis thaliana</i>  | OAP08080.1     |
| <i>Bv</i> UGT73C10    | <i>Barbarea vulgaris</i>     | AFN26666.1     |
| <i>Bv</i> UGT73C11    | <i>Barbarea vulgaris</i>     | AFN26667.1     |
| <i>Bv</i> UGT73A4     | <i>Barbarea vulgaris</i>     | AAS94329.1     |
| <i>Mt</i> UGT73C1     | <i>Medicago truncatula</i>   | XP_003625716.1 |
| <i>Ae</i> UGT73AD2    | <i>Aralia elata</i>          | UMX47351.1     |
| <i>Cf</i> UGT73C2     | <i>Cornus florida</i>        | XP_059646802.1 |
| <i>Lf</i> UGT73C3     | <i>Lycium ferocissimum</i>   | XP_059306976.1 |
| <i>It</i> UGT73CD1    | <i>Iris tectorum</i>         | WBA33390.1     |
| <i>Ge</i> UGT73F1     | <i>Glycyrrhiza echinata</i>  | BAC78438.1     |
| <i>Gm</i> UGT73F4     | <i>Glycine max</i>           | BAM29363.1     |
| <i>Ct</i> UGTUGT73AE1 | <i>Carthamus tinctorius</i>  | AJT58578.1     |
| <i>Gu</i> UGT73F17    | <i>Glycyrrhiza uralensis</i> | AXS75258.1     |
| UGT74                 |                              |                |
| <i>At</i> UGT74F2     | <i>Arabidopsis thaliana</i>  | OAP07463.1     |
| <i>At</i> UGT74F1     | <i>Arabidopsis thaliana</i>  | OAP07994.1     |
| <i>At</i> UGT74B1     | <i>Arabidopsis thaliana</i>  | NP_173820.1    |
| <i>At</i> UGT74E2     | <i>Arabidopsis thaliana</i>  | OAP17332.1     |
| <i>At</i> UGT74E1     | <i>Arabidopsis thaliana</i>  | P0C7P7.1       |
| <i>At</i> UGT74D1     | <i>Arabidopsis thaliana</i>  | OAP11252.1     |
| <i>At</i> UGT74C1     | <i>Arabidopsis thaliana</i>  | Q9SKC1.1       |
| <i>Bv</i> UGT74F5     | <i>Barbarea vulgaris</i>     | AVW82180.1     |
| <i>Bv</i> UGT74F3     | <i>Barbarea vulgaris</i>     | AVW82183.1     |
| <i>Bv</i> UGT74F4     | <i>Barbarea vulgaris</i>     | AVW82182.1     |
| <i>Ae</i> UGT74AG6    | <i>Aralia elata</i>          | UMX47352.1     |
| <i>Ca</i> UGT74AG2    | <i>Centella asiatica</i>     | AUR26630.1     |
| <i>Dc</i> UGT74E2     | <i>Daucus carota</i>         | XP_017242607.1 |
| <i>Sg</i> UGT74AC1    | <i>Siraitia grosvenorii</i>  | K7NBW3.1       |
| <i>Pg</i> UGT74AE2    | <i>Panax ginseng</i>         | QEA68969.1     |
| <i>Pg</i> UGT74A1     | <i>Panax ginseng</i>         | A0A0A6ZFR4.1   |
| UGT75                 |                              |                |
| <i>At</i> UGT75C1     | <i>Arabidopsis thaliana</i>  | Q0WW21.2       |
| <i>At</i> UGT75B2     | <i>Arabidopsis thaliana</i>  | Q9ZVY5.1       |
| <i>At</i> UGT75B1     | <i>Arabidopsis thaliana</i>  | Q9LR44.1       |
| <i>Cs</i> UGT75L12    | <i>Camellia sinensis</i>     | ALO19892.1     |
| <i>Ak</i> UGT75L21    | <i>Angelica keiskei</i>      | AWU66065.1     |
| <i>Ak</i> UGT75W2     | <i>Angelica keiskei</i>      | AWU66066.1     |
| <i>Rc</i> UGT75L20    | <i>Rubus chingii</i>         | AWU66062.1     |
| <i>Rc</i> UGT75T4     | <i>Rubus chingii</i>         | AWU66063.1     |
| <i>As</i> UGT75K6     | <i>Avena strigosa</i>        | AZQ26927.1     |

|                   |                               |                |
|-------------------|-------------------------------|----------------|
| <i>HvUGT75E2</i>  | <i>Hordeum vulgare</i>        | KAE8807698.1   |
| <i>AcUGT75D1</i>  | <i>Acorus calamus</i>         | KAK1294935.1   |
| <i>UGT76</i>      |                               |                |
| <i>AtUGT76E12</i> | <i>Arabidopsis thaliana</i>   | Q94AB5.1       |
| <i>AtUGT76E11</i> | <i>Arabidopsis thaliana</i>   | OAP05192.1     |
| <i>AtUGT76B1</i>  | <i>Arabidopsis thaliana</i>   | OAP05179.1     |
| <i>SrUGT76G1</i>  | <i>Stevia rebaudiana</i>      | AGL95113.1     |
| <i>UGT78</i>      |                               |                |
| <i>AtUGT78D3</i>  | <i>Arabidopsis thaliana</i>   | OAO94865.1     |
| <i>AtUGT78D2</i>  | <i>Arabidopsis thaliana</i>   | Q9LFJ8.1       |
| <i>AtUGT78D1</i>  | <i>Arabidopsis thaliana</i>   | OAP13716.1     |
| <i>MtUGT78G1</i>  | <i>Medicago truncatula</i>    | A6XNC6.1       |
| <i>GMUGT78K1</i>  | <i>Glycine max</i>            | NP_001304377.2 |
| <i>UGT79</i>      |                               |                |
| <i>AtUGT79B7</i>  | <i>Arabidopsis thaliana</i>   | Q9M0P3.1       |
| <i>AtUGT79B11</i> | <i>Arabidopsis thaliana</i>   | Q9XIQ4.1       |
| <i>AtUGT79B2</i>  | <i>Arabidopsis thaliana</i>   | Q9T080.1       |
| <i>AtUGT79B1</i>  | <i>Arabidopsis thaliana</i>   | OAO90958.      |
| <i>GMUGT79B3</i>  | <i>Glycine max</i>            | KAH1247062.1   |
| <i>UGT82</i>      |                               |                |
| <i>AtUGT82A1</i>  | <i>Arabidopsis thaliana</i>   | Q9LHJ2.1       |
| <i>BrUGT82A1</i>  | <i>Brassica rapa</i>          | XP_009110882.1 |
| <i>UGT83</i>      |                               |                |
| <i>AcUGT83A1</i>  | <i>Acorus calamus</i>         | KAK1317019.1   |
| <i>DcUGT83A1</i>  | <i>Dendrobium catenatum</i>   | XP_020671824.1 |
| <i>AsUGT83A1</i>  | <i>Apostasia shenzhenica</i>  | PKA55929.1     |
| <i>UGT84</i>      |                               |                |
| <i>AtUGT84A4</i>  | <i>Arabidopsis thaliana</i>   | OAO98847.1     |
| <i>AtUGT84A3</i>  | <i>Arabidopsis thaliana</i>   | OAP00592.1     |
| <i>AtUGT84A2</i>  | <i>Arabidopsis thaliana</i>   | OAP06181.1     |
| <i>AtUGT84A1</i>  | <i>Arabidopsis thaliana</i>   | OAO99238.1     |
| <i>AtUGT84B2</i>  | <i>Arabidopsis thaliana</i>   | OAP08290.1     |
| <i>AtUGT84B1</i>  | <i>Arabidopsis thaliana</i>   | OAP11221.1     |
| <i>UGT85</i>      |                               |                |
| <i>CsUGT85C2</i>  | <i>Centaurea solstitialis</i> | Q6VAB0.1       |
| <i>CsUGT85C1</i>  | <i>Centaurea solstitialis</i> | Q6VAA4.1       |
| <i>AtUGT85A5</i>  | <i>Arabidopsis thaliana</i>   | OAP19389.1     |
| <i>AtUGT85A4</i>  | <i>Arabidopsis thaliana</i>   | OAP13096.1     |
| <i>AtUGT85A3</i>  | <i>Arabidopsis thaliana</i>   | OAP16353.1     |
| <i>AtUGT85A2</i>  | <i>Arabidopsis thaliana</i>   | OAP18465.1     |
| <i>AtUGT85A1</i>  | <i>Arabidopsis thaliana</i>   | OAP13723.1     |

|                   |                               |                |
|-------------------|-------------------------------|----------------|
| UGT87             |                               |                |
| <i>AtUGT87A2</i>  | <i>Arabidopsis thaliana</i>   | OAP10737.1     |
| <i>AtUGT87A1</i>  | <i>Arabidopsis thaliana</i>   | O64732.1       |
| UGT89             |                               |                |
| <i>AtUGT89C1</i>  | <i>Arabidopsis thaliana</i>   | Q9LNE6.1       |
| <i>AtUGT89B1</i>  | <i>Arabidopsis thaliana</i>   | OAP14423.1     |
| <i>CaUGT89A2</i>  | <i>Cucurbita argyrosperma</i> | KAG7032141.1   |
| UGT90             |                               |                |
| <i>AtUGT90A1</i>  | <i>Arabidopsis thaliana</i>   | Q9ZVX4.1       |
| <i>AtUGT90A2</i>  | <i>Arabidopsis thaliana</i>   | Q9SY84.1       |
| <i>AaUGT90A7</i>  | <i>Artemisia annua</i>        | PWA57943.1     |
| UGT91             |                               |                |
| <i>AtUGT91A1</i>  | <i>Arabidopsis thaliana</i>   | Q940V3.1       |
| <i>BvUGT91A10</i> | <i>Barbarea vulgaris</i>      | AVW82166.1     |
| <i>AtUGT91B1</i>  | <i>Arabidopsis thaliana</i>   | Q9LSM0.1       |
| <i>AtUGT91C1</i>  | <i>Arabidopsis thaliana</i>   | Q9LTA3.1       |
| <i>GmUGT91H9</i>  | <i>Glycine max</i>            | NP_001348424.1 |
| <i>GmUGT91H4</i>  | <i>Glycine max</i>            | NP_001240857.1 |
| <i>CaUGT91D2</i>  | <i>Cucurbita argyrosperma</i> | KAG6582627.1   |
| UGT92             |                               |                |
| <i>AtUGT92A1</i>  | <i>Arabidopsis thaliana</i>   | Q9LXV0.1       |
| UGT94             |                               |                |
| <i>PgUGT94G2</i>  | <i>Panax ginseng</i>          | A0A0A6ZFY4.1   |
| UGT95             |                               |                |
| <i>PoUGT95A1</i>  | <i>Pilosella officinarum</i>  | ACB56927.1     |
| <i>FtUGT95GD1</i> | <i>Fagopyrum tataricum</i>    | QAV53742.1     |
| <i>FtUGT95GD1</i> | <i>Fagopyrum tataricum</i>    | QAV53742.1     |

---
